# Supplementary material
Source: publisher figshare collection journal article supplement (https://acs.figshare.com/ndownloader/files/6500145)
Supplement: Supplementary file 1 [file 6500145]

## **Support Information**

### **LiNi<sub>0.8</sub>Co<sub>0.15</sub>Al<sub>0.05</sub>O<sub>2</sub> (NCA) Cathode Material: New Insights via <sup>7</sup>Li and <sup>27</sup>Al MAS NMR Spectroscopy**

Nicole Leifer, Onit Srur-Lavi, Irina Matlahov, Boris Markovsky, Doron Aurbach, Gil Goobes\*

Department of Chemistry, Bar Ilan University, Ramat Gan 5290002, Israel.

Corresponding Author    \*Email: [gil.goobes@biu.ac.il](mailto:gil.goobes@biu.ac.il)

| a) | □      |                       | b) | □      |                       |
|----|--------|-----------------------|----|--------|-----------------------|
|    | Sample | Main Resonances (ppm) |    | Sample | Main Resonances (ppm) |
|    | 1A     | 0, ~500               |    | 1B     | 0, ~500               |
|    | 2A     | 0, 171, 111           |    | 2B     | 0, 36                 |
|    | 3A     | 0, 313                |    | 3B     | 0, 376                |
|    | 4A     | 0, ~450               |    | 4B     | 0, ~500               |
|    | 5A     | 0, 157, 102           |    | 5B     | 0, 84                 |
|    | 6A     | 0, ~430               |    | 6B     | 0, ~500               |
|    | 7A     | 0, ~430               |    |        |                       |

Table S1:  $^7\text{Li}$  resonance shift values of NCA samples from (a) protocol A and (b) protocol B. The values listed for samples 1A, 4A, 6A, 7A, 1B, 4B and 6B are approximate measurements of the centers of the broad signals. The values given for samples 2A, 3A, 5A, 2B, 3B and 5B are precise.

| a) | □      |                       | b) | □      |                       |
|----|--------|-----------------------|----|--------|-----------------------|
|    | Sample | Main Resonances (ppm) |    | Sample | Main Resonances (ppm) |
|    | 1A     | -970, -1180           |    | 1B     | -979, -1084           |
|    | 2A     | 0, -40                |    | 2B     | -36, 20               |
|    | 3A     | 0, -86, -338          |    | 3B     | -81                   |
|    | 4A     | -4 -575               |    | 4B     | -972, -1077           |
|    | 5A     | -8, -100              |    | 5B     | -21, 19               |
|    | 6A     | -32, -440             |    | 6B     | -969, -1075           |
|    | 7A     | 0, -484               |    |        |                       |

Table S2: Approximate  $^{27}\text{Al}$  resonance shift values of NCA samples from (a) protocol A and (b) protocol B.

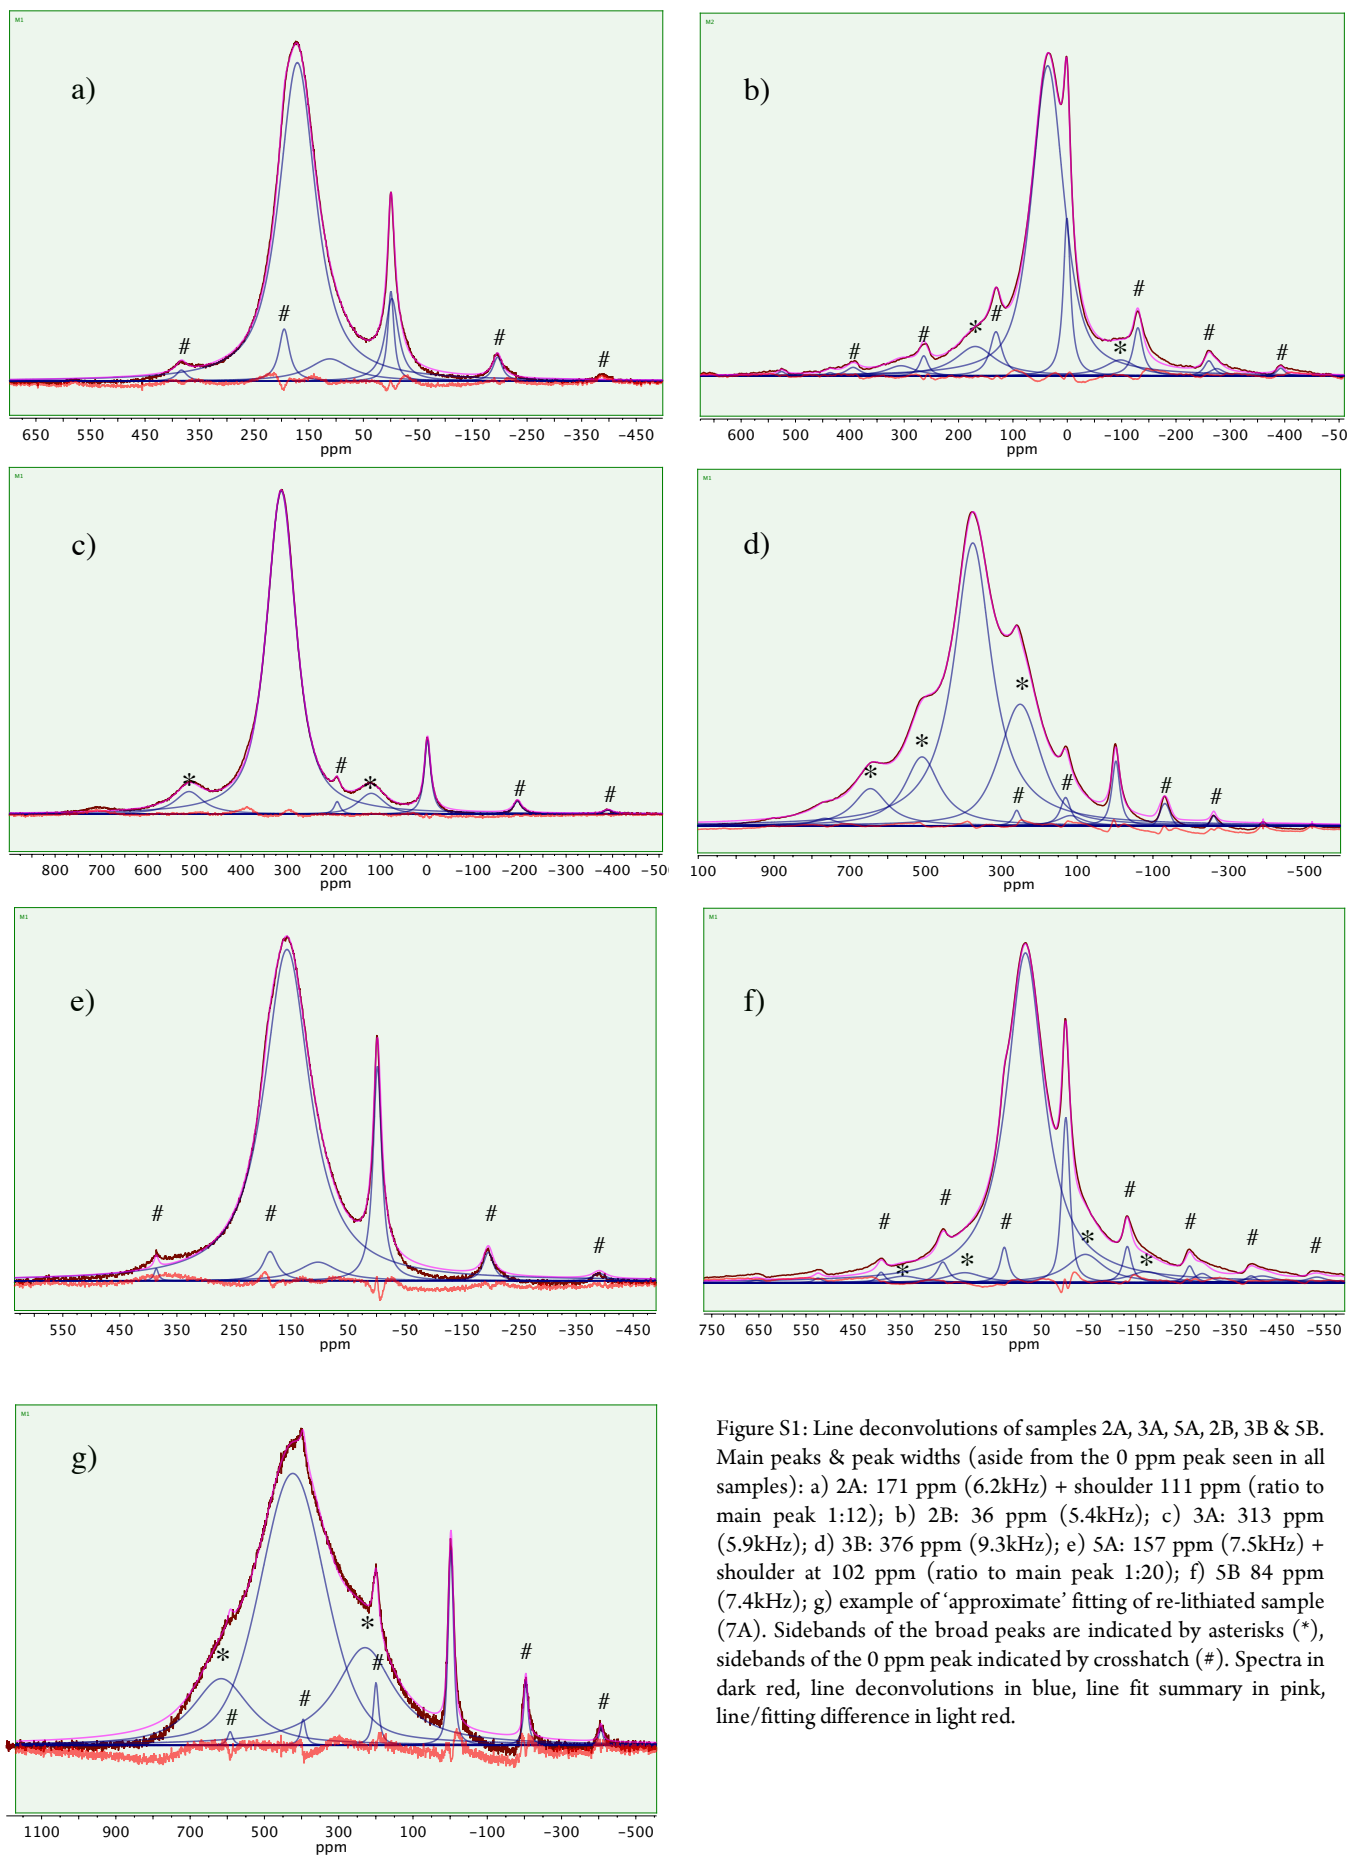

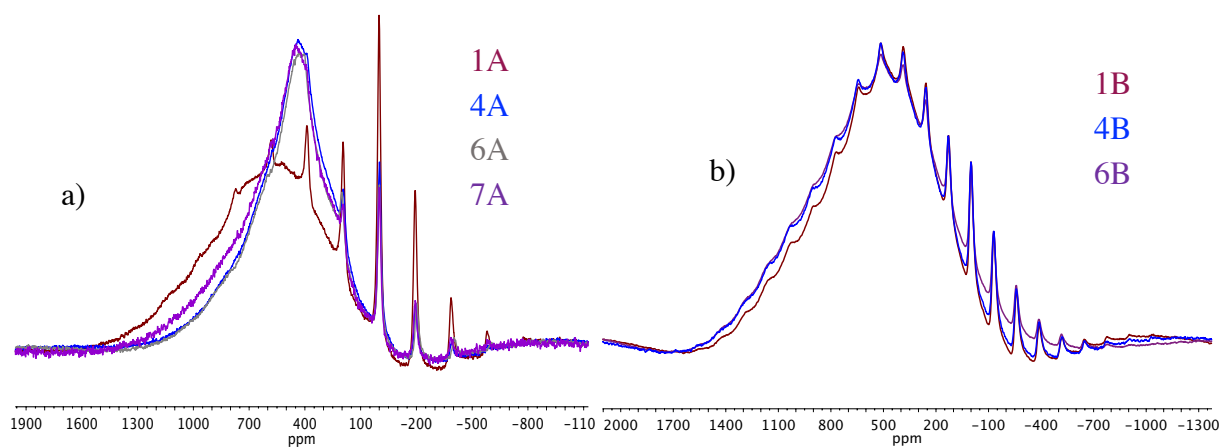

Figure S2:  $^7\text{Li}$  single pulse spectra of pristine and re-lithiated samples a) 1A, 4A, 6A and 7A; and b) 1B, 4B & 6B, normalized to equal intensities and superimposed to highlight similarities/differences in spectra upon cycling and re-lithiation.

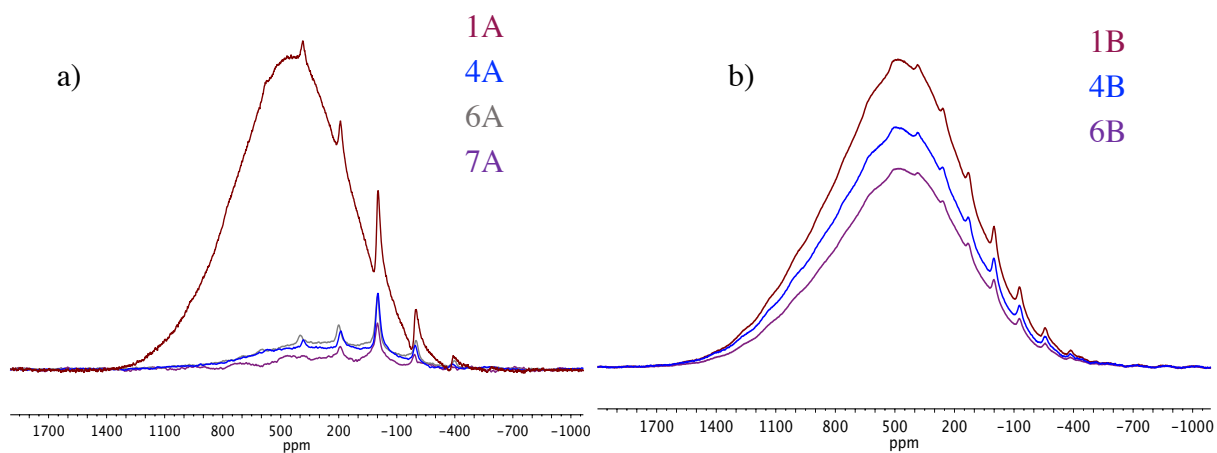

Figure S3:  $^7\text{Li}$  Hahn-echo spectra of pristine and re-lithiated samples a) 1A, 4A, 6A and 7A; and b) 1B, 4B & 6B, collected with identical parameters including number of scans, and normalized to mass of sample, superimposed to highlight similarities/differences in each group of spectra.

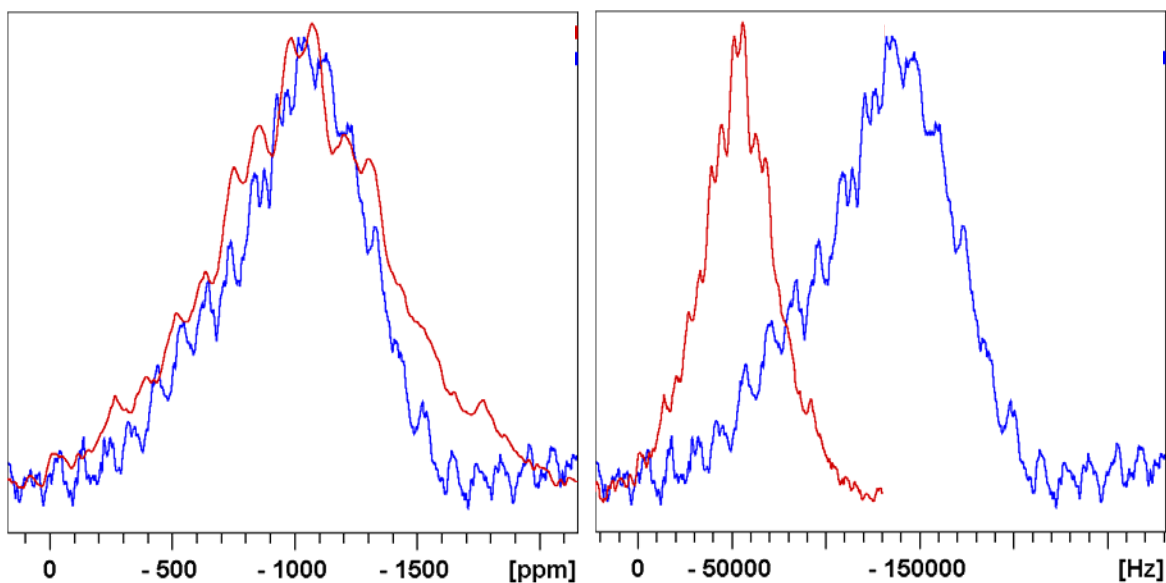

Figure S4 (left)  $^{27}\text{Al}$  solid-echo spectra (drawn on a ppm scale) of sample 1B measured at a field of 11.74 T (blue) and at a field of 4.7 T (red). Exponential multiplication of 1000 Hz is used here to show that the spectrum at 4.7 T is identical to that shown in Figure 3 sample 1B. (right)  $^{27}\text{Al}$  solid-echo spectra (drawn on a Hertz scale) of sample 1B measured at a field of 11.74 T (blue) and at a field of 4.7 T (red).

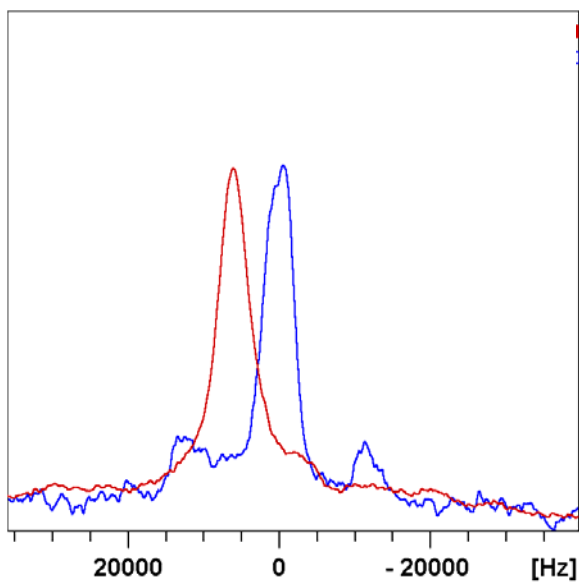

Figure S5  $^{27}\text{Al}$  solid-echo spectra (drawn on a Hertz scale) of sample 5B measured at a field of 11.74 T (red) and at a field of 4.7 T (blue).
